# Supplementary material for: α-Fe2O3 Nanoparticles Aided-Dual Conversion for Self-Powered Bio-Based Photodetector
Source: MDPI journal article supplement (doi:10.3390/nano12071147), 2022-03-30
Supplement: s1 [file s1]

## Supplementary Materials

# $\alpha$ -Fe<sub>2</sub>O<sub>3</sub> Nanoparticles Aided-Dual Conversion for Self-Powered Bio-based Photodetector

Ishita Chakraborty <sup>1</sup>, Sz-Nian Lai <sup>2,3</sup>, Jyh-Ming Wu <sup>2,4</sup> and Chao-Sung Lai <sup>1,5,6,7,\*</sup>

<sup>1</sup> Department of Electronic Engineering, Chang Gung University, Guishan District, Taoyuan City 33302, Taiwan; d0627107@cgu.edu.tw

<sup>2</sup> Department of Materials Science and Engineering, National Tsing Hua University, Hsinchu 30010, Taiwan; snlai712@gapp.nthu.edu.tw (S.-N.L.); jmwuyun@gapp.nthu.edu.tw (J.-M.W.)

<sup>3</sup> Ph.D. Program in Prospective Functional Materials Industry, National Tsing Hua University, Hsinchu 30010, Taiwan

<sup>4</sup> High Entropy Materials Center, National Tsing Hua University, Hsinchu 30010, Taiwan

<sup>5</sup> Artificial Intelligence and Green Technology Research Center, Chang Gung University, Guishan District, Taoyuan City 33302, Taiwan

<sup>6</sup> Department of Materials Engineering, Ming Chi University of Technology, Taishan District, New Taipei City 24301, Taiwan

<sup>7</sup> Department of Nephrology, Chang Gung Memorial Hospital, Guishan District, Taoyuan City 33305, Taiwan

\* Correspondence: cslai@mail.cgu.edu.tw

**Citation:** Chakraborty, I.; Lai, S.-N.;

Wu, J.-M.; Lai, C.-S.  $\alpha$ -Fe<sub>2</sub>O<sub>3</sub>

Nanoparticles Aided-Dual

Conversion for Self-Powered

Bio-based Photodetector.

*Nanomaterials* **2022**, *12*, 1147.

<https://doi.org/10.3390/nano12071147>

7

Academic Editor: Werner Blau

Received: 24 February 2022

Accepted: 27 March 2022

Published: date

**Publisher's Note:** MDPI stays neutral with regard to jurisdictional claims in published maps and institutional affiliations.

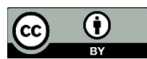

**Copyright:** © 2022 by the authors.

Submitted for possible open access

publication under the terms and

conditions of the Creative Commons

Attribution (CC BY) license

(<https://creativecommons.org/licenses/by/4.0/>).

s/by/4.0/).

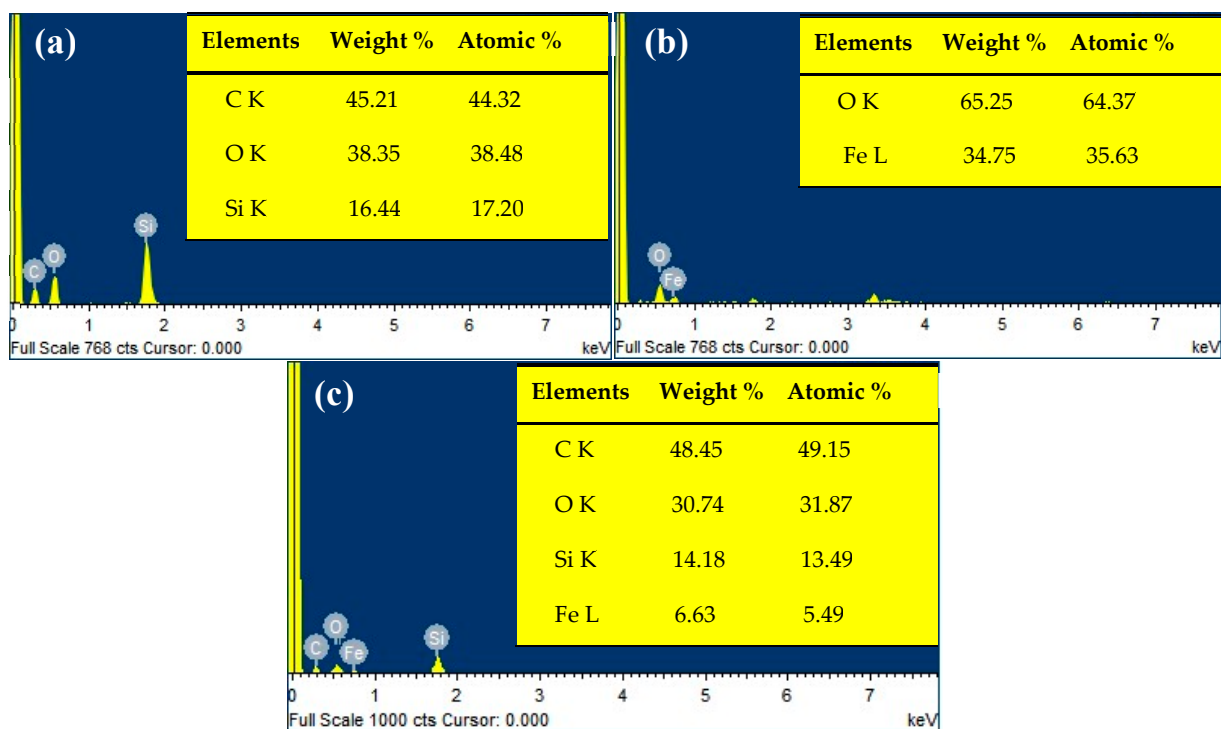

**Figure S1.** EDS analysis results of the (a) PDMS film (b)  $\alpha$ -Fe<sub>2</sub>O<sub>3</sub> nanoparticles and (c) PDMS/ $\alpha$ -Fe<sub>2</sub>O<sub>3</sub> nanocomposite film.

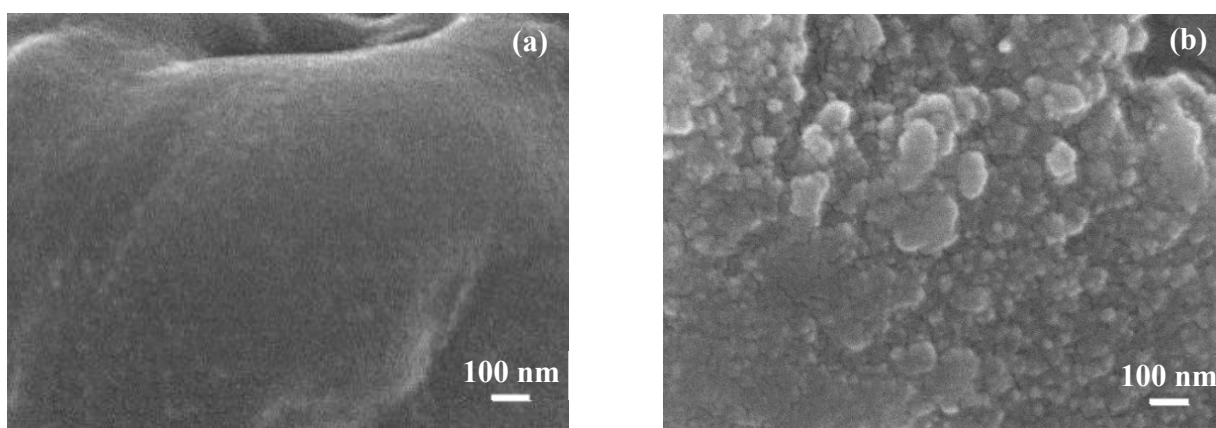

**Figure S2.** FESEM images of the (a) PDMS film and (b) PDMS/ $\alpha$ -Fe<sub>2</sub>O<sub>3</sub> nanocomposite film.

(a)

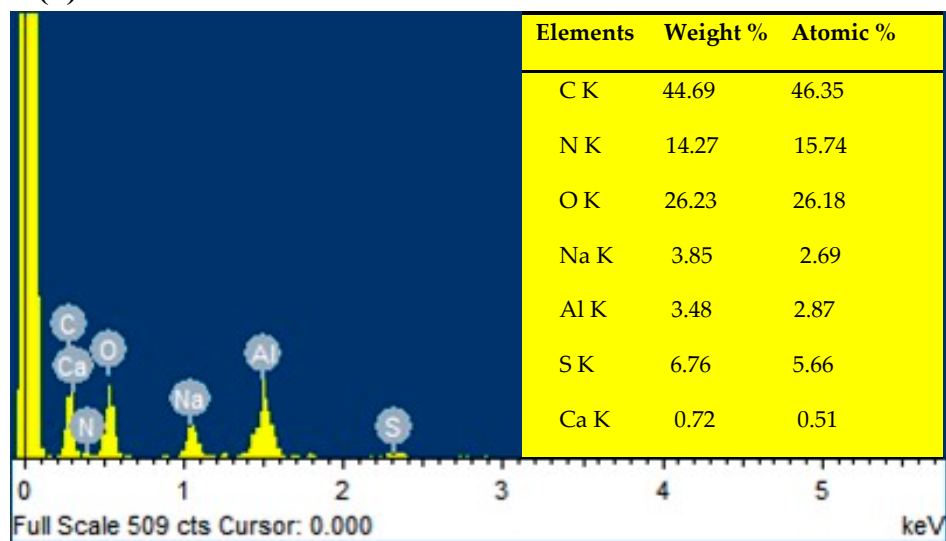

(b)

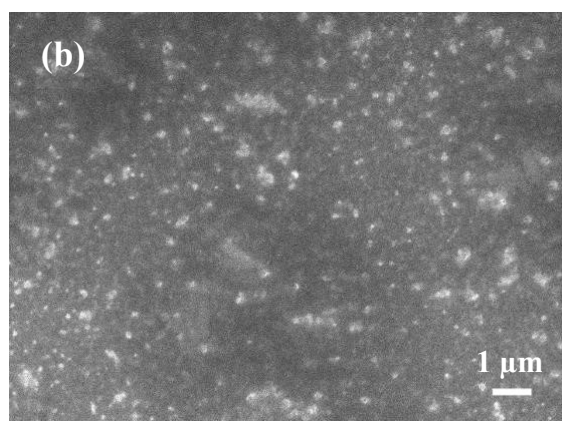

**Figure S3.** (a) Results of the EDS analysis for processed hair film. (b) FESEM image of the processed hair film.

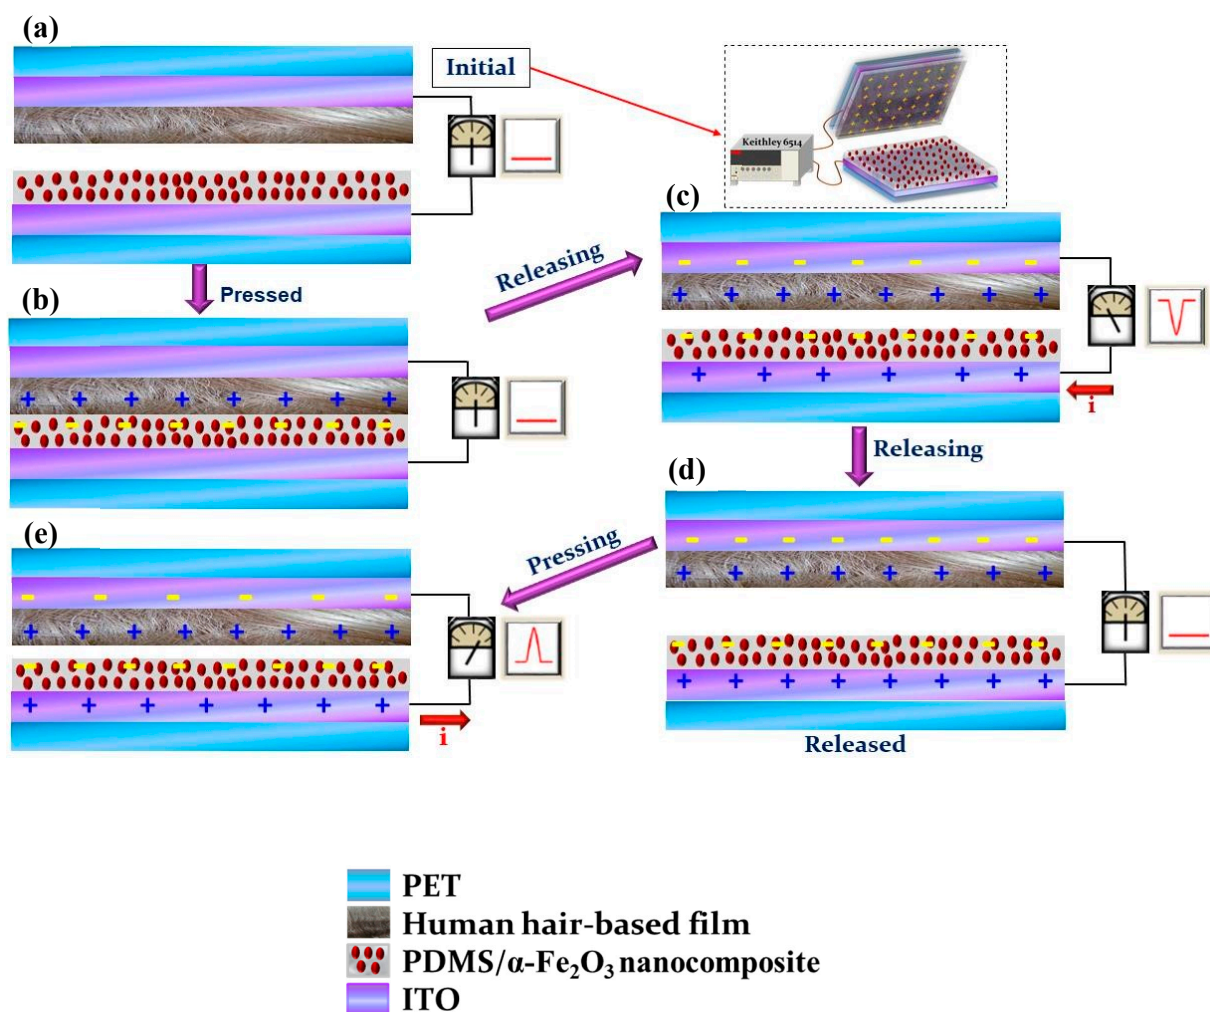

**Figure S4.** Working mechanism of the TENG consist of PDMS/ $\alpha$ -Fe<sub>2</sub>O<sub>3</sub> nanocomposite film (as the negative tribo-layer) and human hair (as the positive tribo-layer) under dark state: (a) Initial stage of operation of the TENG (b) The first contact state without any output signal arises (c) On releasing state, a negative electrical output signal arose (d) After the friction layers get completely released, the output signal drops to zero (e) On subsequent pressing, a positive electrical signal is produced.
